# Supplementary material for: A Velocity Stretch Reflex Threshold Based on Muscle–Tendon Unit Peak Acceleration to Detect Possible Occurrences of Spasticity during Gait in Children with Cerebral Palsy
Source: MDPI journal article supplement (doi:10.3390/s24010041), 2023-12-20
Supplement: s1 [file s1]

**Figure S1: Superposition of stretches of one subject.** Procedure of  $T_{vmt}$  determination based on EMG (blue lines) or on kinematics (green lines) for the 3 stretches of one subject's trial. For ease of reading, only one EMG-Onset method is presented. First row: EMG recordings of the Soleus muscle. Muscle activity is in red, while the blue dashed lines represent the EMG-Onset minus 30ms. Second row: Musculo-tendon acceleration ( $a_{mt}$ ) of the Soleus muscle. The green dashed lines represent the maximum. Third row: Second derivative of the passive moment. The black dashed lines represent the maximum, which we consider to be the catch. Fourth row: Musculo-tendon velocity ( $v_{mt}$ ) of the Soleus (Sol) muscle. The green and blue dashed or dash-dotted lines represent the musculo-tendon velocity thresholds ( $T_{vmt}$ ) determined through MaxAcc and EMG-Onset methods respectively. T0: beginning of the stretch. Stretch 1: solid line. Stretch 2: dashed line. Stretch 3: dotted line.

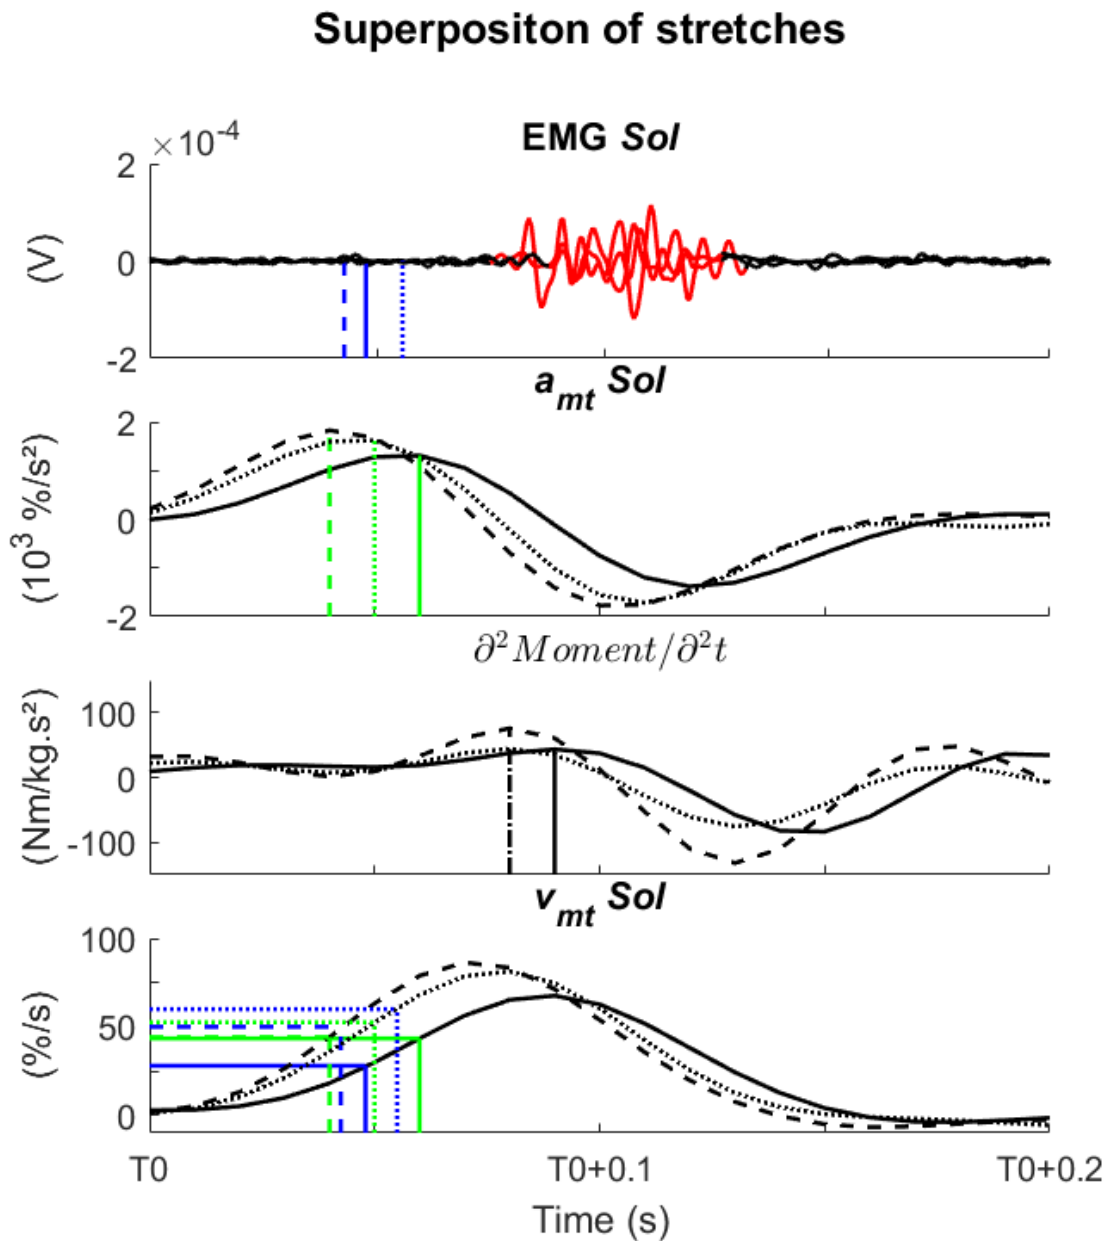

**Figure S2: Comparative boxplots of studied parameters between the three methods for all the positions.** Following figures present the  $T_{vmt}$  values (in %/s), the number of  $T_{vmt}$  exceedances per gait cycle (in /gait cycle) and the proportion of the gait trial time (in %) where  $v_{mt}$  is exceeding  $T_{vmt}$  for the different positions.

## Position P1

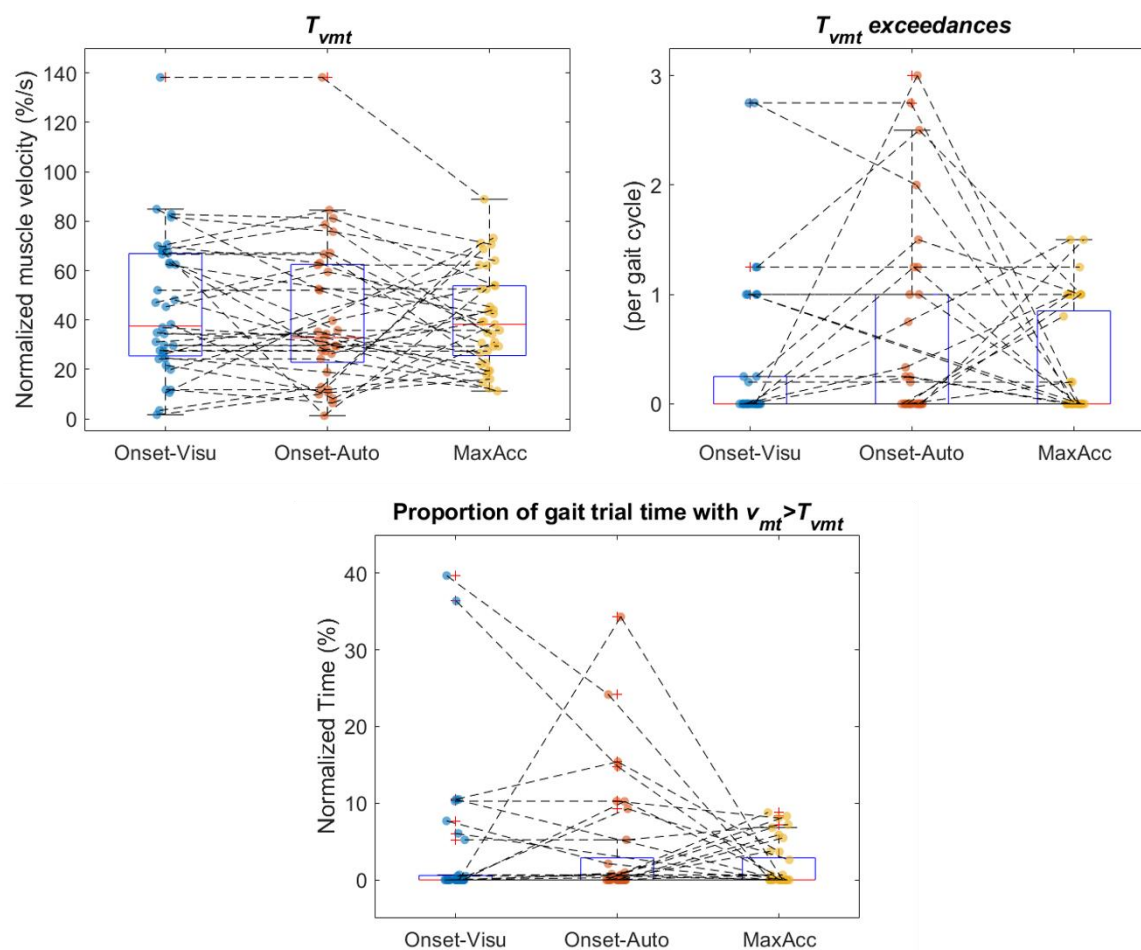

# Position P2

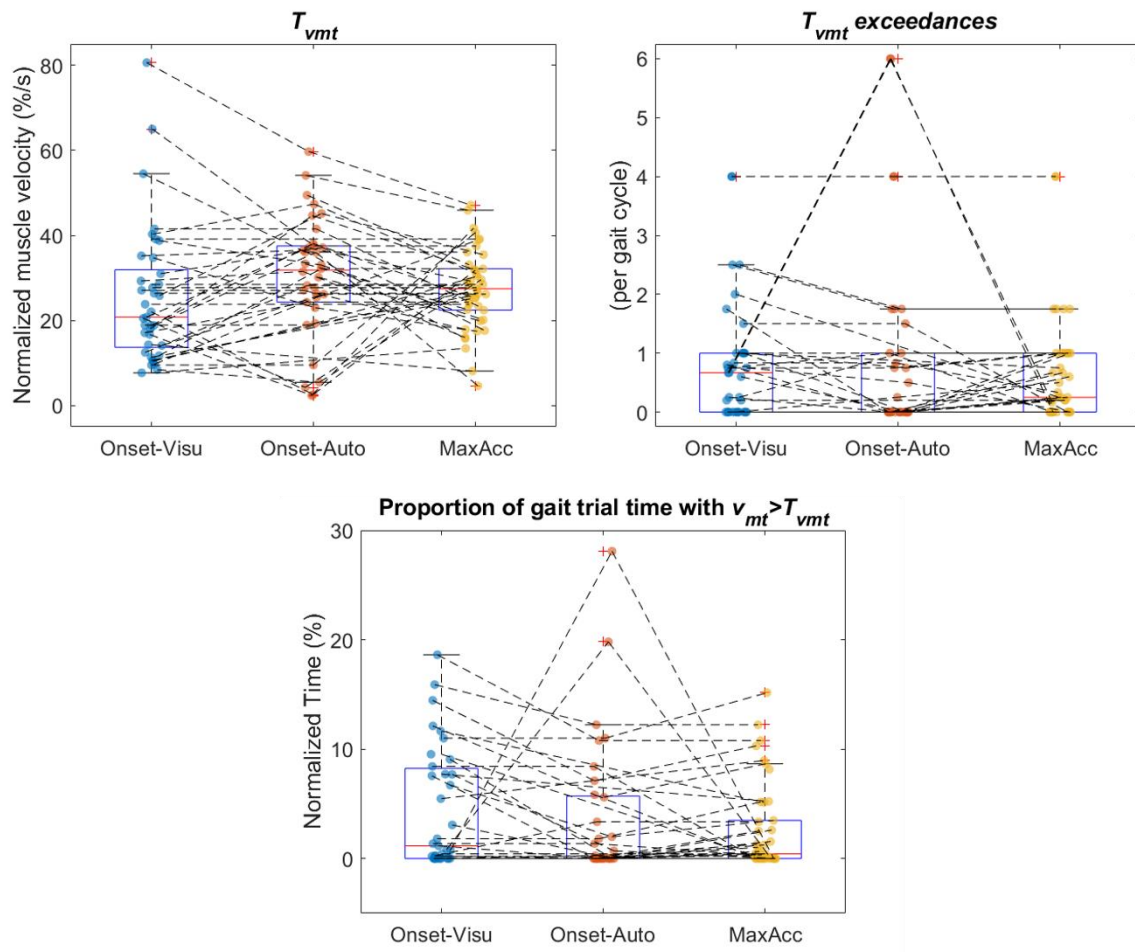

# Position P3

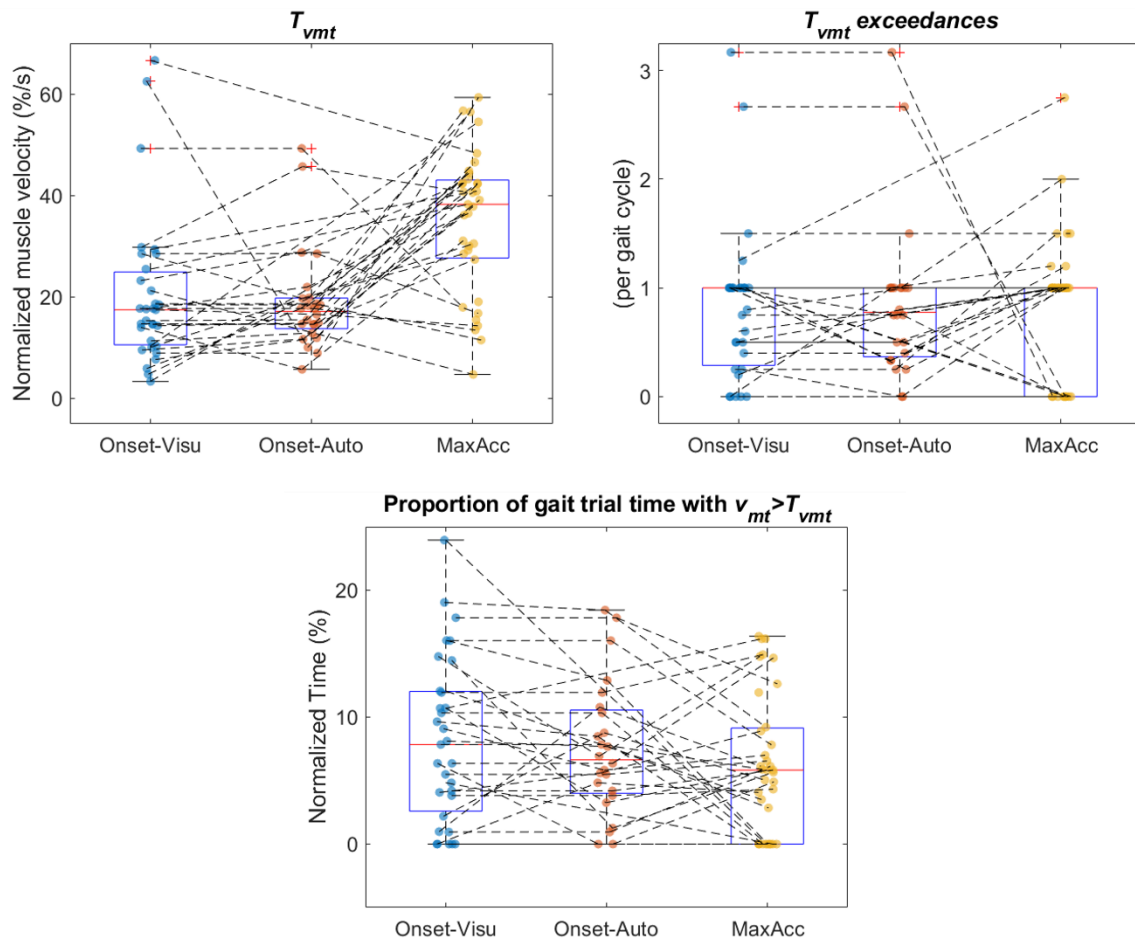

# Position P4

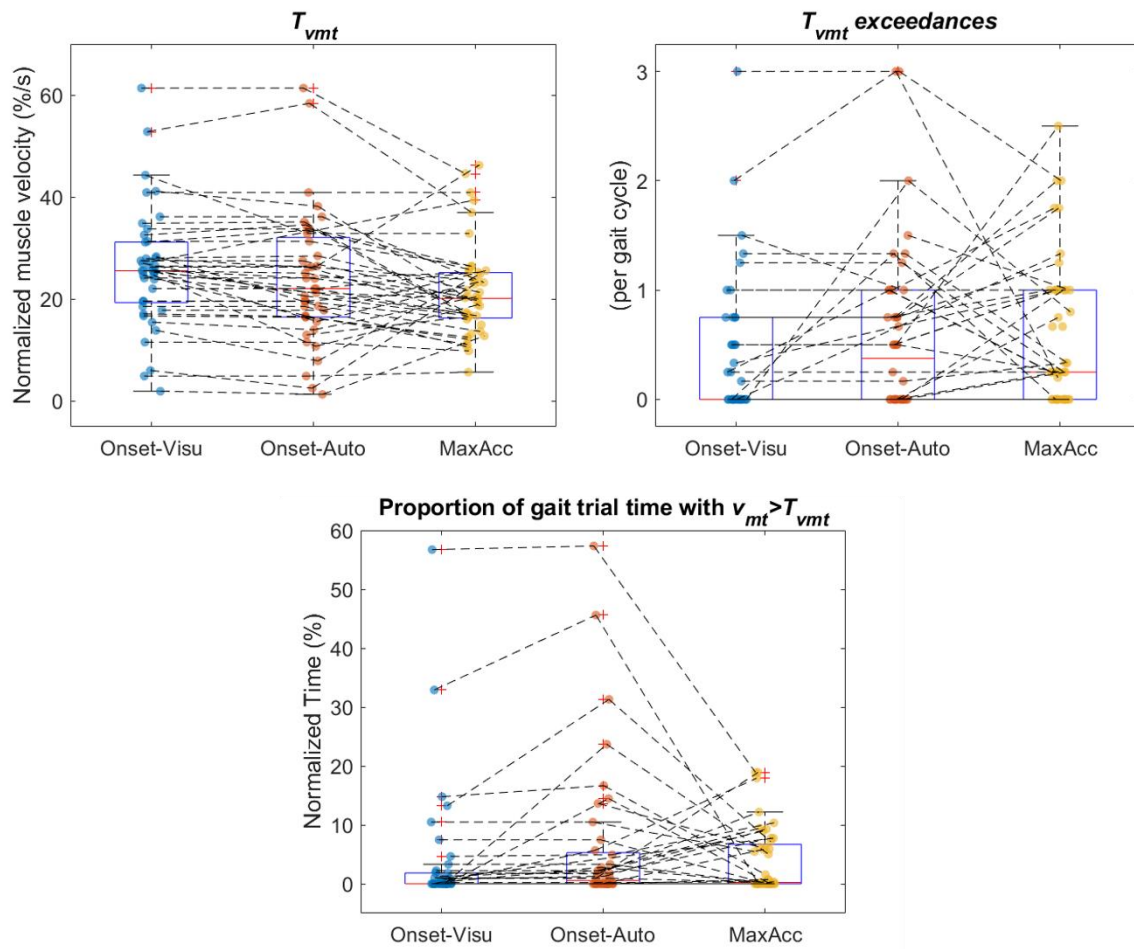

**Table S1: Pre-T0 detailed values.** Following tables present the delay (in ms) between the timing of beginning of the stretch and the EMG-Onset minus 30ms or maximum  $a_{mt}$  values for the different positions. For EMG-Onset-Auto, N/A represents the cases where no EMG-Onset was found. Red cases represent pre-T0 physiological inconsistencies.

| Position 1 (n=37)           |            |            |        |
|-----------------------------|------------|------------|--------|
| Subject                     | Onset-Visu | Onset-Auto | MaxAcc |
| S1 – Stretch 1              | 28.0       | 60.5       | 100.0  |
| S1 – Stretch 2              | 27.5       | 57.0       | 110.0  |
| S2 – Stretch 1              | 98.0       | 91.0       | 60.0   |
| S2 – Stretch 2              | 181.5      | 192.5      | 160.0  |
| S2 – Stretch 3              | 42.0       | 42.0       | 30.0   |
| S3 – Stretch 1              | 77.0       | 76.5       | 40.0   |
| S3 – Stretch 2              | 121.0      | 87.0       | 50.0   |
| S5 – Stretch 1              | 105.0      | 97.5       | 80.0   |
| S5 – Stretch 2              | 152.0      | 152.0      | 90.0   |
| S5 – Stretch 3              | 117.0      | 105.0      | 70.0   |
| S6 – Stretch 1              | 32.0       | 19.5       | 10.0   |
| S6 – Stretch 2              | 107.0      | 90.0       | 80.0   |
| S8 – Stretch 1              | 193.0      | 192.0      | 120.0  |
| S8 – Stretch 2              | 106.5      | 108.0      | 70.0   |
| S9 – Stretch 1              | 50.5       | -10.5      | 30.0   |
| S9 – Stretch 2              | 73.0       | 48.0       | 40.0   |
| S9 – Stretch 3              | 53.5       | 56.5       | 40.0   |
| S10 – Stretch 1             | 61.0       | 38.0       | 40.0   |
| S10 – Stretch 2             | 75.0       | 82.5       | 20.0   |
| S10 – Stretch 3             | 93.5       | 66.5       | 40.0   |
| S11 – Stretch 1             | 162.0      | 145.0      | 50.0   |
| S11 – Stretch 2             | 172.5      | 174.0      | 30.0   |
| S12 – Stretch 1             | 49.5       | 38.0       | 60.0   |
| S12 – Stretch 2             | 199.0      | 96.0       | 100.0  |
| S13 – Stretch 1             | 112.0      | 109.0      | 30.0   |
| S13 – Stretch 2             | 124.0      | 86.0       | 50.0   |
| S14 – Stretch 1             | 108.5      | 123.5      | 100.0  |
| S14 – Stretch 2             | 67.0       | 67.5       | 30.0   |
| S14 – Stretch 3             | 149.0      | 155.0      | 150.0  |
| S16 – Stretch 1             | 51.5       | 17.5       | 40.0   |
| S16 – Stretch 2             | 60.0       | 60.0       | 60.0   |
| S17 – Stretch 1             | 109.5      | 108.0      | 110.0  |
| S17 – Stretch 2             | 55.0       | 40.0       | 40.0   |
| S17 – Stretch 3             | 117.0      | 58.0       | 100.0  |
| S18 – Stretch 1             | 49.5       | 71.5       | 70.0   |
| S18 – Stretch 2             | 38.5       | -112.0     | 60.0   |
| S18 – Stretch 3             | 43.5       | -10.5      | 70.0   |
| Median                      | 93.5       | 76.5       | 60.0   |
| 25 <sup>th</sup> percentile | 51.5       | 48.0       | 40.0   |
| 75 <sup>th</sup> percentile | 117.0      | 108.0      | 90.0   |

| Position 2 (n=42)           |            |            |        |
|-----------------------------|------------|------------|--------|
| Subject                     | Onset-Visu | Onset-Auto | MaxAcc |
| S1 – Stretch 1              | -14.0      | 35.5       | 20.0   |
| S1 – Stretch 2              | -21.0      | -193.5     | 40.0   |
| S2 – Stretch 1              | 69.0       | 92.5       | 80.0   |
| S2 – Stretch 2              | 43.0       | 34.0       | 60.0   |
| S2 – Stretch 3              | 22.0       | 26.5       | 30.0   |
| S3 – Stretch 1              | 84.0       | 106.5      | 40.0   |
| S3 – Stretch 2              | 106.5      | 70.5       | 50.0   |
| S4 – Stretch 1              | 178.0      | 188.5      | 140.0  |
| S4 – Stretch 2              | 110.5      | 95.0       | 40.0   |
| S4 – Stretch 3              | 111.0      | 85.5       | 60.0   |
| S5 – Stretch 1              | 54.5       | 92.0       | 60.0   |
| S5 – Stretch 2              | 98.0       | -268.0     | 90.0   |
| S5 – Stretch 3              | 153.0      | 317.0      | 140.0  |
| S6 – Stretch 1              | 81.0       | 81.0       | 70.0   |
| S6 – Stretch 2              | 70.0       | 72.5       | 60.0   |
| S6 – Stretch 3              | 74.5       | 92.0       | 30.0   |
| S8 – Stretch 1              | 108.0      | 139.0      | 10.0   |
| S8 – Stretch 2              | 66.5       | 115.5      | 10.0   |
| S8 – Stretch 3              | 127.5      | 429.0      | 140.0  |
| S9 – Stretch 1              | 97.0       | 49.5       | 100.0  |
| S9 – Stretch 2              | 178.0      | 175.0      | 180.0  |
| S9 – Stretch 3              | 94.0       | 57.0       | 90.0   |
| S11 – Stretch 1             | 204.5      | 133.0      | 100.0  |
| S11 – Stretch 2             | 244.0      | 166.0      | 150.0  |
| S12 – Stretch 1             | 73.0       | 76.0       | 70.0   |
| S12 – Stretch 2             | 60.0       | 63.0       | 30.0   |
| S13 – Stretch 1             | 53.5       | 52.0       | 20.0   |
| S13 – Stretch 2             | 79.0       | 57.5       | 40.0   |
| S13 – Stretch 3             | 99.0       | 74.0       | 60.0   |
| S14 – Stretch 1             | 42.0       | -1.0       | 30.0   |
| S14 – Stretch 2             | 9.0        | 13.0       | 30.0   |
| S15 – Stretch 1             | 83.5       | 89.0       | 60.0   |
| S15 – Stretch 2             | 64.5       | 111.5      | 80.0   |
| S15 – Stretch 3             | 86.0       | 65.5       | 60.0   |
| S16 – Stretch 1             | 39.0       | N/A        | 50.0   |
| S16 – Stretch 2             | 31.0       | 52.0       | 40.0   |
| S16 – Stretch 3             | 76.0       | 99.5       | 80.0   |
| S17 – Stretch 1             | 54.5       | 77         | 60     |
| S17 – Stretch 2             | 67.0       | 86.5       | 80.0   |
| S18 – Stretch 1             | 142.5      | -16.0      | 150.0  |
| S18 – Stretch 2             | 60.5       | 79.5       | 80     |
| S18 – Stretch 3             | 64.5       | 17         | 80     |
| Median                      | 75.2       | 77.0       | 60.0   |
| 25 <sup>th</sup> percentile | 55.9       | 52.0       | 40.0   |
| 75 <sup>th</sup> percentile | 104.6      | 99.5       | 80.0   |

| Position 3 (n=35) |  |  |  |
|-------------------|--|--|--|
|-------------------|--|--|--|

| Subject                           | Onset-Visu   | Onset-Auto   | MaxAcc       |
|-----------------------------------|--------------|--------------|--------------|
| S1 – Stretch 1                    | 204.5        | 110.0        | 170.0        |
| S1 – Stretch 2                    | 194.0        | 179.0        | 250.0        |
| S1 – Stretch 3                    | 184.0        | 136.5        | 210.0        |
| S2 – Stretch 1                    | 233.5        | 253.0        | 270.0        |
| S2 – Stretch 2                    | 182.5        | 195.0        | 220.0        |
| S2 – Stretch 3                    | 202.0        | 387.0        | 330.0        |
| S5 – Stretch 1                    | 119.5        | 118.5        | 90.0         |
| S5 – Stretch 2                    | 165.5        | 170.5        | 110.0        |
| S6 – Stretch 1                    | 262.5        | 230.5        | 250.0        |
| S6 – Stretch 2                    | 206.0        | 311.5        | 260.0        |
| S8 – Stretch 1                    | 173.5        | 172.5        | 120.0        |
| S8 – Stretch 2                    | 145.5        | 144.5        | 100.0        |
| S8 – Stretch 3                    | 179.5        | 238.0        | 10.0         |
| S9 – Stretch 1                    | 89.5         | 94.5         | 190.0        |
| S9 – Stretch 2                    | 102.5        | 150.5        | 190.0        |
| S11 – Stretch 1                   | 382.0        | 362.0        | 240.0        |
| S11 – Stretch 2                   | 332.5        | 388.5        | 220.0        |
| S12 – Stretch 1                   | 183.5        | 190.5        | 120.0        |
| S12 – Stretch 2                   | 170.5        | 171.0        | 200.0        |
| S13 – Stretch 1                   | 258.5        | 258.0        | 160.0        |
| S13 – Stretch 2                   | 253.0        | 252.0        | 90.0         |
| S14 – Stretch 1                   | 203.5        | 201.5        | 220.0        |
| S14 – Stretch 2                   | 253.0        | 263.0        | 300.0        |
| S14 – Stretch 3                   | 239.0        | 238.0        | 290.0        |
| S15 – Stretch 1                   | 147.0        | N/A          | 120.0        |
| S15 – Stretch 2                   | 82.5         | -199.0       | 180.0        |
| S16 – Stretch 1                   | 106.5        | -5.0         | 140.0        |
| S16 – Stretch 2                   | 188.0        | -13.5        | 210.0        |
| S16 – Stretch 3                   | 185.5        | N/A          | 260.0        |
| S17 – Stretch 1                   | 37.0         | 86.0         | 140.0        |
| S17 – Stretch 2                   | 85.0         | 91.0         | 160.0        |
| S17 – Stretch 3                   | 80.0         | 83.5         | 170.0        |
| S18 – Stretch 1                   | 59.0         | 131.5        | 150.0        |
| S18 – Stretch 2                   | 189.5        | 193.5        | 270.0        |
| S18 – Stretch 3                   | 168.5        | 175.0        | 260.0        |
| <b>Median</b>                     | <b>183.5</b> | <b>175.0</b> | <b>190.0</b> |
| <b>25<sup>th</sup> percentile</b> | <b>132.5</b> | <b>118.5</b> | <b>140.0</b> |
| <b>75<sup>th</sup> percentile</b> | <b>205.3</b> | <b>238.0</b> | <b>250.0</b> |

| Subject                           | Onset-Visu   | Onset-Auto   | MaxAcc       |
|-----------------------------------|--------------|--------------|--------------|
| S1 – Stretch 1                    | 161.0        | 162.0        | 150.0        |
| S1 – Stretch 2                    | 277.0        | 276.0        | 250.0        |
| S1 – Stretch 3                    | 116.0        | 122.0        | 130.0        |
| S2 – Stretch 1                    | 272.5        | -195.0       | 300.0        |
| S2 – Stretch 2                    | 169.5        | 132.0        | 280.0        |
| S2 – Stretch 3                    | 161.5        | 111.5        | 130.0        |
| S3 – Stretch 1                    | 211.0        | 232.5        | 160.0        |
| S3 – Stretch 2                    | 191.0        | 194.5        | 100.0        |
| S3 – Stretch 3                    | 334.0        | N/A          | 140.0        |
| S4 – Stretch 1                    | 273.0        | 279.0        | 230.0        |
| S4 – Stretch 2                    | 189.0        | 266.5        | 100.0        |
| S4 – Stretch 3                    | 426.5        | 429.5        | 430.0        |
| S5 – Stretch 1                    | 119.5        | 101.5        | 80.0         |
| S5 – Stretch 2                    | 167.0        | 170.5        | 140.0        |
| S5 – Stretch 3                    | 140.0        | 138.0        | 120.0        |
| S6 – Stretch 1                    | 309.0        | 171.5        | 250.0        |
| S6 – Stretch 2                    | 248.0        | 197.0        | 110.0        |
| S6 – Stretch 3                    | 272.5        | 178.5        | 180.0        |
| S7 – Stretch 1                    | 293.5        | 294.0        | 220.0        |
| S7 – Stretch 2                    | 199.5        | 182.5        | 270.0        |
| S7 – Stretch 3                    | 334.0        | 337.5        | 420.0        |
| S8 – Stretch 1                    | 296.0        | 286.5        | 180.0        |
| S8 – Stretch 2                    | 220.0        | 219.5        | 120.0        |
| S8 – Stretch 3                    | 321.5        | 281.5        | 230.0        |
| S9 – Stretch 1                    | 240.5        | 243.5        | 240.0        |
| S9 – Stretch 2                    | 206.5        | 206.5        | 190.0        |
| S12 – Stretch 1                   | 188.5        | 187.5        | 150.0        |
| S12 – Stretch 2                   | 176.5        | 184.5        | 150.0        |
| S12 – Stretch 3                   | 225.0        | 189.5        | 180.0        |
| S13 – Stretch 1                   | 225.0        | 224.5        | 170.0        |
| S13 – Stretch 2                   | 250.0        | 250.0        | 200.0        |
| S13 – Stretch 3                   | 164.5        | 139.5        | 90.0         |
| S14 – Stretch 1                   | 279.5        | 281.0        | 230.0        |
| S14 – Stretch 2                   | 229.0        | 131.0        | 140.0        |
| S14 – Stretch 3                   | 218.5        | 225.5        | 190.0        |
| S15 – Stretch 1                   | 270.0        | 283.0        | 170.0        |
| S15 – Stretch 2                   | 88.0         | 81.5         | 200.0        |
| S15 – Stretch 3                   | 138.0        | 99.0         | 170.0        |
| S16 – Stretch 1                   | 356.5        | 352.5        | 320.0        |
| S16 – Stretch 2                   | 217.5        | 223.5        | 190.0        |
| S16 – Stretch 3                   | 128.5        | 136.5        | 60.0         |
| S18 – Stretch 1                   | 174.5        | 170          | 170.0        |
| S18 – Stretch 2                   | 237.5        | 236          | 250.0        |
| S18 – Stretch 3                   | 346.5        | 347.5        | 290.0        |
| <b>Median</b>                     | <b>222.5</b> | <b>197.0</b> | <b>180.0</b> |
| <b>25<sup>th</sup> percentile</b> | <b>173.3</b> | <b>150.8</b> | <b>140.0</b> |
| <b>75<sup>th</sup> percentile</b> | <b>274.0</b> | <b>271.3</b> | <b>232.5</b> |

Position 4 (n=44)

**Table S2: Post-Catch detailed values.** Following tables present the delay (in ms) between the timing of the EMG-Onset minus 30ms or maximum  $a_{mt}$  values and the catch for the different positions. N/A represents the cases where no EMG-Onset was found. Red cases represent post-catch physiological inconsistencies.

| Position 1 (n=37)           |            |            |        |
|-----------------------------|------------|------------|--------|
| Subject                     | Onset-Visu | Onset-Auto | MaxAcc |
| S1 – Stretch 1              | 102.0      | 69.5       | 30.0   |
| S1 – Stretch 2              | 122.5      | 93.0       | 40.0   |
| S2 – Stretch 1              | 12.0       | 19.0       | 50.0   |
| S2 – Stretch 2              | 28.5       | 17.5       | 50.0   |
| S2 – Stretch 3              | 38.0       | 38.0       | 50.0   |
| S3 – Stretch 1              | 43.0       | 43.5       | 80.0   |
| S3 – Stretch 2              | 39.0       | 73.0       | 110.0  |
| S5 – Stretch 1              | 15.0       | 22.5       | 40.0   |
| S5 – Stretch 2              | 18.0       | 18.0       | 80.0   |
| S5 – Stretch 3              | 13.0       | 25.0       | 60.0   |
| S6 – Stretch 1              | 28.0       | 40.5       | 50.0   |
| S6 – Stretch 2              | 23.0       | 40.0       | 50.0   |
| S8 – Stretch 1              | 17.0       | 18.0       | 90.0   |
| S8 – Stretch 2              | 23.5       | 22.0       | 60.0   |
| S9 – Stretch 1              | 29.5       | 78.5       | 50.0   |
| S9 – Stretch 2              | 17.0       | 42.0       | 50.0   |
| S9 – Stretch 3              | 36.5       | 33.5       | 50.0   |
| S10 – Stretch 1             | 39.0       | 62.0       | 60.0   |
| S10 – Stretch 2             | 35.0       | 27.5       | 90.0   |
| S10 – Stretch 3             | 26.5       | 53.5       | 80.0   |
| S11 – Stretch 1             | 28.0       | 45.0       | 140.0  |
| S11 – Stretch 2             | -52.5      | -54.0      | 90.0   |
| S12 – Stretch 1             | 30.5       | 42.0       | 20.0   |
| S12 – Stretch 2             | 41.0       | 44.0       | 40.0   |
| S13 – Stretch 1             | 18.0       | 21.0       | 100.0  |
| S13 – Stretch 2             | 26.0       | 64.0       | 100.0  |
| S14 – Stretch 1             | 31.5       | 16.5       | 40.0   |
| S14 – Stretch 2             | 13.0       | 12.5       | 50.0   |
| S14 – Stretch 3             | 51.0       | 45.0       | 50.0   |
| S16 – Stretch 1             | 48.5       | 82.5       | 60.0   |
| S16 – Stretch 2             | 60.0       | 60.0       | 60.0   |
| S17 – Stretch 1             | 40.5       | 42.0       | 40.0   |
| S17 – Stretch 2             | 35.0       | 50.0       | 50.0   |
| S17 – Stretch 3             | 23.0       | 82.0       | 40.0   |
| S18 – Stretch 1             | 60.5       | 38.5       | 40.0   |
| S18 – Stretch 2             | 61.5       | 212.0      | 40.0   |
| S18 – Stretch 3             | 66.5       | 108.5      | 40.0   |
| Median                      | 30.5       | 42.0       | 50.0   |
| 25 <sup>th</sup> percentile | 23.5       | 22.5       | 40.0   |
| 75 <sup>th</sup> percentile | 41.0       | 62.0       | 80.0   |

| Position 2 (n=42) |
|-------------------|
|-------------------|

| Subject                     | Onset-Visu | Onset-Auto | MaxAcc |
|-----------------------------|------------|------------|--------|
| S1 – Stretch 1              | 94.0       | 44.5       | 60.0   |
| S1 – Stretch 2              | 121.0      | 293.5      | 60.0   |
| S2 – Stretch 1              | 71.0       | 47.5       | 60.0   |
| S2 – Stretch 2              | 77.0       | 86.0       | 60.0   |
| S2 – Stretch 3              | 58.0       | 53.5       | 50.0   |
| S3 – Stretch 1              | 36.0       | 13.5       | 80.0   |
| S3 – Stretch 2              | 3.5        | 39.5       | 60.0   |
| S4 – Stretch 1              | 42.0       | 31.5       | 80.0   |
| S4 – Stretch 2              | -0.5       | 15.0       | 70.0   |
| S4 – Stretch 3              | 19.0       | 44.5       | 70.0   |
| S5 – Stretch 1              | 65.5       | 28.0       | 60.0   |
| S5 – Stretch 2              | 52.0       | 418.0      | 60.0   |
| S5 – Stretch 3              | 47.0       | -117.0     | 60.0   |
| S6 – Stretch 1              | 39.0       | 39.0       | 50.0   |
| S6 – Stretch 2              | 30.0       | 27.5       | 40.0   |
| S6 – Stretch 3              | 25.5       | 8.0        | 70.0   |
| S8 – Stretch 1              | 32.0       | 1.0        | 130.0  |
| S8 – Stretch 2              | 33.5       | -15.5      | 90.0   |
| S8 – Stretch 3              | 52.5       | -249.0     | 40.0   |
| S9 – Stretch 1              | 43.0       | 90.5       | 40.0   |
| S9 – Stretch 2              | 52.0       | 55.0       | 50.0   |
| S9 – Stretch 3              | 46.0       | 83.0       | 50.0   |
| S11 – Stretch 1             | -24.5      | 47.0       | 80.0   |
| S11 – Stretch 2             | -54.0      | 24.0       | 40.0   |
| S12 – Stretch 1             | 57.0       | 54.0       | 60.0   |
| S12 – Stretch 2             | 40.0       | 37.0       | 70.0   |
| S13 – Stretch 1             | 26.5       | 28.0       | 60.0   |
| S13 – Stretch 2             | 11.0       | 32.5       | 50.0   |
| S13 – Stretch 3             | 11.0       | 36.0       | 50.0   |
| S14 – Stretch 1             | 38.0       | 81.0       | 50.0   |
| S14 – Stretch 2             | 71.0       | 67.0       | 50.0   |
| S15 – Stretch 1             | 26.5       | 21.0       | 50.0   |
| S15 – Stretch 2             | 55.5       | 8.5        | 40.0   |
| S15 – Stretch 3             | 34.0       | 54.5       | 60.0   |
| S16 – Stretch 1             | 51.0       | N/A        | 40.0   |
| S16 – Stretch 2             | 59.0       | 38.0       | 50.0   |
| S16 – Stretch 3             | 34.0       | 10.5       | 30.0   |
| S17 – Stretch 1             | 55.5       | 33.0       | 50.0   |
| S17 – Stretch 2             | 73.0       | 53.5       | 60.0   |
| S18 – Stretch 1             | 17.5       | 176.0      | 10.0   |
| S18 – Stretch 2             | 39.5       | 20.5       | 20.0   |
| S18 – Stretch 3             | 45.5       | 93         | 30.0   |
| Median                      | 39.0       | 34.5       | 50.0   |
| 25 <sup>th</sup> percentile | 26.5       | 19.1       | 40.0   |
| 75 <sup>th</sup> percentile | 52.0       | 54.1       | 60.0   |

| Position 3 (n=35) |
|-------------------|
|-------------------|



| Subject                           | Onset-Visu   | Onset-Auto   | MaxAcc       |
|-----------------------------------|--------------|--------------|--------------|
| S1 – Stretch 1                    | 105.5        | 200.0        | 140.0        |
| S1 – Stretch 2                    | 146.0        | 161.0        | 90.0         |
| S1 – Stretch 3                    | 136.0        | 183.5        | 110.0        |
| S2 – Stretch 1                    | 86.5         | 67.0         | 50.0         |
| S2 – Stretch 2                    | 87.5         | 75.0         | 50.0         |
| S2 – Stretch 3                    | 168.0        | -17.0        | 40.0         |
| S5 – Stretch 1                    | 80.5         | 81.5         | 110.0        |
| S5 – Stretch 2                    | 104.5        | 99.5         | 160.0        |
| S6 – Stretch 1                    | 117.5        | 149.5        | 130.0        |
| S6 – Stretch 2                    | 134.0        | 28.5         | 80.0         |
| S8 – Stretch 1                    | -3.5         | -2.5         | 50.0         |
| S8 – Stretch 2                    | 64.5         | 65.5         | 110.0        |
| S8 – Stretch 3                    | 30.5         | -28.0        | 200.0        |
| S9 – Stretch 1                    | 90.5         | 85.5         | 30.0         |
| S9 – Stretch 2                    | 107.5        | 59.5         | 20.0         |
| S11 – Stretch 1                   | -32.0        | -12.0        | 110.0        |
| S11 – Stretch 2                   | -22.5        | -78.5        | 90.0         |
| S12 – Stretch 1                   | 86.5         | 79.5         | 150.0        |
| S12 – Stretch 2                   | 49.5         | 49.0         | 20.0         |
| S13 – Stretch 1                   | 61.5         | 62.0         | 160.0        |
| S13 – Stretch 2                   | -23.0        | -22.0        | 140.0        |
| S14 – Stretch 1                   | 56.5         | 58.5         | 40.0         |
| S14 – Stretch 2                   | 77.0         | 67.0         | 30.0         |
| S14 – Stretch 3                   | 111.0        | 112.0        | 60.0         |
| S15 – Stretch 1                   | 23.0         | N/A          | 50.0         |
| S15 – Stretch 2                   | 117.5        | 399.0        | 20.0         |
| S16 – Stretch 1                   | 43.5         | 155.0        | 10.0         |
| S16 – Stretch 2                   | 42.0         | 243.5        | 20.0         |
| S16 – Stretch 3                   | 154.5        | N/A          | 80.0         |
| S17 – Stretch 1                   | 203.0        | 154.0        | 100.0        |
| S17 – Stretch 2                   | 185.0        | 179.0        | 110.0        |
| S17 – Stretch 3                   | 110.0        | 106.5        | 20.0         |
| S18 – Stretch 1                   | 131.0        | 58.5         | 40.0         |
| S18 – Stretch 2                   | 120.5        | 116.5        | 40.0         |
| S18 – Stretch 3                   | 121.5        | 115.0        | 30.0         |
| <b>Median</b>                     | <b>90.5</b>  | <b>79.5</b>  | <b>60.0</b>  |
| <b>25<sup>th</sup> percentile</b> | <b>53.0</b>  | <b>58.5</b>  | <b>35.0</b>  |
| <b>75<sup>th</sup> percentile</b> | <b>121.0</b> | <b>149.5</b> | <b>110.0</b> |

| Position 4 (n=44)                 |              |              |              |
|-----------------------------------|--------------|--------------|--------------|
| Subject                           | Onset-Visu   | Onset-Auto   | MaxAcc       |
| S1 – Stretch 1                    | 129.0        | 128.0        | 170.0        |
| S1 – Stretch 2                    | 193.0        | 194.0        | 250.0        |
| S1 – Stretch 3                    | 144.0        | 138.0        | 160.0        |
| S2 – Stretch 1                    | 137.5        | 605.0        | 140.0        |
| S2 – Stretch 2                    | 250.5        | 288.0        | 170.0        |
| S2 – Stretch 3                    | 128.5        | 178.5        | 190.0        |
| S3 – Stretch 1                    | 9.0          | -12.5        | 90.0         |
| S3 – Stretch 2                    | -31.0        | -34.5        | 90.0         |
| S3 – Stretch 3                    | -114.0       | N/A          | 110.0        |
| S4 – Stretch 1                    | 17.0         | 11.0         | 90.0         |
| S4 – Stretch 2                    | 151.0        | 73.5         | 270.0        |
| S4 – Stretch 3                    | 13.5         | 10.5         | 40.0         |
| S5 – Stretch 1                    | 90.5         | 108.5        | 160.0        |
| S5 – Stretch 2                    | 83.0         | 79.5         | 140.0        |
| S5 – Stretch 3                    | 60.0         | 62.0         | 110.0        |
| S6 – Stretch 1                    | 51.0         | 188.5        | 140.0        |
| S6 – Stretch 2                    | 42.0         | 93.0         | 210.0        |
| S6 – Stretch 3                    | 47.5         | 141.5        | 170.0        |
| S7 – Stretch 1                    | 126.5        | 126.0        | 230.0        |
| S7 – Stretch 2                    | 100.5        | 117.5        | 60.0         |
| S7 – Stretch 3                    | 116.0        | 112.5        | 60.0         |
| S8 – Stretch 1                    | 54.0         | 63.5         | 200.0        |
| S8 – Stretch 2                    | 80.0         | 80.5         | 210.0        |
| S8 – Stretch 3                    | 98.5         | 138.5        | 220.0        |
| S9 – Stretch 1                    | 79.5         | 76.5         | 110.0        |
| S9 – Stretch 2                    | 53.5         | 53.5         | 100.0        |
| S12 – Stretch 1                   | 11.5         | 12.5         | 80.0         |
| S12 – Stretch 2                   | 73.5         | 65.5         | 130.0        |
| S12 – Stretch 3                   | 15.0         | 50.5         | 90.0         |
| S13 – Stretch 1                   | 35.0         | 35.5         | 120.0        |
| S13 – Stretch 2                   | 40.0         | 40.0         | 120.0        |
| S13 – Stretch 3                   | 25.5         | 50.5         | 130.0        |
| S14 – Stretch 1                   | 130.5        | 129.0        | 210.0        |
| S14 – Stretch 2                   | -10.5        | 99.0         | 120.0        |
| S14 – Stretch 3                   | 21.5         | 14.5         | 80.0         |
| S15 – Stretch 1                   | 20.0         | 7.0          | 150.0        |
| S15 – Stretch 2                   | 192.0        | 198.5        | 110.0        |
| S15 – Stretch 3                   | 102.0        | 141.0        | 100.0        |
| S16 – Stretch 1                   | 63.5         | 67.5         | 130.0        |
| S16 – Stretch 2                   | 62.5         | 56.5         | 120.0        |
| S16 – Stretch 3                   | 51.5         | 43.5         | 150.0        |
| S18 – Stretch 1                   | 55.5         | 60.0         | 90.0         |
| S18 – Stretch 2                   | 72.5         | 74.0         | 90.0         |
| S18 – Stretch 3                   | 73.5         | 72.5         | 160.0        |
| <b>Median</b>                     | <b>63.0</b>  | <b>74.0</b>  | <b>130.0</b> |
| <b>25<sup>th</sup> percentile</b> | <b>32.6</b>  | <b>50.5</b>  | <b>97.5</b>  |
| <b>75<sup>th</sup> percentile</b> | <b>105.5</b> | <b>128.5</b> | <b>170.0</b> |

**Table S3:  $T_{vmt}$  detailed values.** Following tables present the  $T_{vmt}$  values (in %/s) for the different positions. N/A represents the cases where no EMG-Onset was found or where physiological inconsistencies (pre-T0 or post-catch) were found.

| Position 1 (n=37)                 |              |              |              |
|-----------------------------------|--------------|--------------|--------------|
| Subject                           | Onset-Visu   | Onset-Auto   | MaxAcc       |
| S1 – Stretch 1                    | 3.42         | 12.91        | 68.70        |
| S1 – Stretch 2                    | 1.69         | 9.93         | 71.11        |
| S2 – Stretch 1                    | 34.87        | 31.45        | 21.94        |
| S2 – Stretch 2                    | 31.17        | 35.22        | 26.61        |
| S2 – Stretch 3                    | 27.42        | 27.42        | 27.42        |
| S3 – Stretch 1                    | 34.38        | 34.38        | 19.37        |
| S3 – Stretch 2                    | 36.93        | 32.93        | 17.94        |
| S5 – Stretch 1                    | 81.59        | 75.77        | 64.07        |
| S5 – Stretch 2                    | 67.12        | 67.12        | 34.31        |
| S5 – Stretch 3                    | 82.79        | 81.15        | 53.80        |
| S6 – Stretch 1                    | 48.13        | 29.39        | 29.39        |
| S6 – Stretch 2                    | 62.44        | 35.83        | 35.83        |
| S8 – Stretch 1                    | 24.24        | 24.24        | 14.70        |
| S8 – Stretch 2                    | 52.04        | 52.04        | 30.72        |
| S9 – Stretch 1                    | 62.55        | N/A          | 42.53        |
| S9 – Stretch 2                    | 84.84        | 52.55        | 52.55        |
| S9 – Stretch 3                    | 45.38        | 59.49        | 45.38        |
| S10 – Stretch 1                   | 21.70        | 10.55        | 16.09        |
| S10 – Stretch 2                   | 29.62        | 29.62        | 11.25        |
| S10 – Stretch 3                   | 24.62        | 18.91        | 12.39        |
| S11 – Stretch 1                   | 68.42        | 78.67        | 34.94        |
| S11 – Stretch 2                   | N/A          | N/A          | 29.30        |
| S12 – Stretch 1                   | 11.71        | 6.41         | 31.11        |
| S12 – Stretch 2                   | 11.79        | 11.79        | 19.55        |
| S13 – Stretch 1                   | 66.62        | 66.62        | 22.60        |
| S13 – Stretch 2                   | 69.99        | 63.06        | 39.19        |
| S14 – Stretch 1                   | 70.55        | 84.47        | 70.55        |
| S14 – Stretch 2                   | 138.18       | 138.18       | 88.86        |
| S14 – Stretch 3                   | 47.06        | 62.29        | 62.29        |
| S16 – Stretch 1                   | 38.25        | 8.17         | 38.25        |
| S16 – Stretch 2                   | 27.67        | 27.67        | 39.40        |
| S17 – Stretch 1                   | 29.83        | 29.83        | 43.45        |
| S17 – Stretch 2                   | 63.23        | 26.38        | 44.15        |
| S17 – Stretch 3                   | 67.97        | 1.28         | 52.49        |
| S18 – Stretch 1                   | 19.96        | 39.74        | 54.10        |
| S18 – Stretch 2                   | 26.32        | N/A          | 62.07        |
| S18 – Stretch 3                   | 10.63        | N/A          | 73.17        |
| <b>Median</b>                     | <b>37.59</b> | <b>32.93</b> | <b>38.25</b> |
| <b>25<sup>th</sup> percentile</b> | <b>25.90</b> | <b>24.24</b> | <b>26.61</b> |
| <b>75<sup>th</sup> percentile</b> | <b>66.75</b> | <b>62.29</b> | <b>53.80</b> |

| Position 2 (n=42) |
|-------------------|
|-------------------|

| Subject                           | Onset-Visu   | Onset-Auto   | MaxAcc       |
|-----------------------------------|--------------|--------------|--------------|
| S1 – Stretch 1                    | N/A          | 30.16        | 19.87        |
| S1 – Stretch 2                    | N/A          | N/A          | 22.43        |
| S2 – Stretch 1                    | 14.10        | 26.18        | 26.18        |
| S2 – Stretch 2                    | 8.42         | 5.46         | 29.59        |
| S2 – Stretch 3                    | 10.42        | 19.30        | 30.40        |
| S3 – Stretch 1                    | 30.98        | 37.14        | 17.62        |
| S3 – Stretch 2                    | 34.76        | 22.99        | 17.45        |
| S4 – Stretch 1                    | 29.28        | 31.51        | 16.00        |
| S4 – Stretch 2                    | N/A          | 33.32        | 22.57        |
| S4 – Stretch 3                    | 38.76        | 33.04        | 20.11        |
| S5 – Stretch 1                    | 18.78        | 38.05        | 25.29        |
| S5 – Stretch 2                    | 28.47        | N/A          | 28.47        |
| S5 – Stretch 3                    | 23.81        | N/A          | 23.81        |
| S6 – Stretch 1                    | 27.71        | 27.71        | 27.71        |
| S6 – Stretch 2                    | 26.38        | 26.38        | 26.38        |
| S6 – Stretch 3                    | 35.19        | 36.49        | 15.74        |
| S8 – Stretch 1                    | 18.79        | 36.01        | 4.64         |
| S8 – Stretch 2                    | 14.30        | N/A          | 8.10         |
| S8 – Stretch 3                    | 7.68         | N/A          | 13.45        |
| S9 – Stretch 1                    | 22.06        | 2.57         | 31.80        |
| S9 – Stretch 2                    | 18.91        | 18.91        | 25.70        |
| S9 – Stretch 3                    | 20.50        | 4.25         | 29.12        |
| S11 – Stretch 1                   | N/A          | 49.46        | 33.09        |
| S11 – Stretch 2                   | N/A          | 54.11        | 45.90        |
| S12 – Stretch 1                   | 17.10        | 24.30        | 24.30        |
| S12 – Stretch 2                   | 27.09        | 27.09        | 17.87        |
| S13 – Stretch 1                   | 41.52        | 41.52        | 23.36        |
| S13 – Stretch 2                   | 80.63        | 59.71        | 47.12        |
| S13 – Stretch 3                   | 65.00        | 37.50        | 37.50        |
| S14 – Stretch 1                   | 39.14        | N/A          | 39.14        |
| S14 – Stretch 2                   | 9.52         | 9.52         | 40.67        |
| S15 – Stretch 1                   | 40.26        | 47.36        | 31.00        |
| S15 – Stretch 2                   | 18.05        | 44.65        | 31.98        |
| S15 – Stretch 3                   | 54.50        | 36.07        | 36.07        |
| S16 – Stretch 1                   | 11.31        | N/A          | 25.33        |
| S16 – Stretch 2                   | 11.71        | 32.15        | 32.15        |
| S16 – Stretch 3                   | 25.85        | 45.14        | 35.46        |
| S17 – Stretch 1                   | 20.78        | 37.09        | 29.23        |
| S17 – Stretch 2                   | 12.48        | 28.21        | 28.21        |
| S18 – Stretch 1                   | 10.55        | N/A          | 27.17        |
| S18 – Stretch 2                   | 9.70         | 25.41        | 38.94        |
| S18 – Stretch 3                   | 16.71        | 2.35         | 41.73        |
| <b>Median</b>                     | <b>20.78</b> | <b>31.83</b> | <b>27.44</b> |
| <b>25<sup>th</sup> percentile</b> | <b>14.10</b> | <b>24.58</b> | <b>22.46</b> |
| <b>75<sup>th</sup> percentile</b> | <b>30.98</b> | <b>37.41</b> | <b>32.11</b> |

| Position 3 (n=35) |
|-------------------|
|-------------------|

| Subject                           | Onset-Visu   | Onset-Auto   | MaxAcc       |
|-----------------------------------|--------------|--------------|--------------|
| S1 – Stretch 1                    | 62.48        | 10.07        | 44.85        |
| S1 – Stretch 2                    | 15.32        | 15.50        | 43.21        |
| S1 – Stretch 3                    | 13.98        | 5.72         | 31.06        |
| S2 – Stretch 1                    | 17.62        | 21.96        | 36.47        |
| S2 – Stretch 2                    | 23.22        | 28.78        | 42.46        |
| S2 – Stretch 3                    | 3.35         | N/A          | 40.56        |
| S5 – Stretch 1                    | 28.54        | 28.54        | 16.77        |
| S5 – Stretch 2                    | 17.73        | 17.73        | 13.47        |
| S6 – Stretch 1                    | 28.51        | 19.69        | 28.51        |
| S6 – Stretch 2                    | 29.79        | 45.70        | 40.73        |
| S8 – Stretch 1                    | N/A          | N/A          | 19.04        |
| S8 – Stretch 2                    | 18.46        | 18.46        | 11.50        |
| S8 – Stretch 3                    | 21.24        | N/A          | 4.72         |
| S9 – Stretch 1                    | 9.55         | 11.68        | 36.12        |
| S9 – Stretch 2                    | 14.31        | 14.89        | 39.09        |
| S11 – Stretch 1                   | N/A          | N/A          | 30.03        |
| S11 – Stretch 2                   | N/A          | N/A          | 29.22        |
| S12 – Stretch 1                   | 17.47        | 16.56        | 14.32        |
| S12 – Stretch 2                   | 17.73        | 17.73        | 42.26        |
| S13 – Stretch 1                   | 49.28        | 49.28        | 17.96        |
| S13 – Stretch 2                   | N/A          | N/A          | 15.46        |
| S14 – Stretch 1                   | 14.61        | 14.61        | 27.39        |
| S14 – Stretch 2                   | 11.35        | 12.89        | 37.82        |
| S14 – Stretch 3                   | 18.66        | 18.66        | 42.41        |
| S15 – Stretch 1                   | 66.63        | N/A          | 48.32        |
| S15 – Stretch 2                   | 10.33        | N/A          | 54.51        |
| S16 – Stretch 1                   | 25.49        | N/A          | 38.26        |
| S16 – Stretch 2                   | 29.37        | N/A          | 40.82        |
| S16 – Stretch 3                   | 10.08        | N/A          | 30.51        |
| S17 – Stretch 1                   | 4.76         | 19.83        | 56.47        |
| S17 – Stretch 2                   | 14.70        | 14.70        | 56.69        |
| S17 – Stretch 3                   | 8.94         | 8.94         | 59.32        |
| S18 – Stretch 1                   | 5.91         | 18.29        | 44.39        |
| S18 – Stretch 2                   | 14.62        | 14.62        | 46.56        |
| S18 – Stretch 3                   | 7.69         | 11.93        | 42.25        |
| <b>Median</b>                     | <b>17.47</b> | <b>17.15</b> | <b>38.26</b> |
| <b>25<sup>th</sup> percentile</b> | <b>10.84</b> | <b>14.18</b> | <b>27.95</b> |
| <b>75<sup>th</sup> percentile</b> | <b>24.35</b> | <b>19.73</b> | <b>42.84</b> |

| Position 4 (n=44)                 |              |              |              |
|-----------------------------------|--------------|--------------|--------------|
| Subject                           | Onset-Visu   | Onset-Auto   | MaxAcc       |
| S1 – Stretch 1                    | 40.91        | 40.91        | 40.91        |
| S1 – Stretch 2                    | 61.36        | 61.36        | 44.59        |
| S1 – Stretch 3                    | 26.50        | 26.50        | 46.26        |
| S2 – Stretch 1                    | 27.41        | N/A          | 39.37        |
| S2 – Stretch 2                    | 6.04         | 2.55         | 22.91        |
| S2 – Stretch 3                    | 24.69        | 10.76        | 18.90        |
| S3 – Stretch 1                    | 25.58        | N/A          | 17.14        |
| S3 – Stretch 2                    | N/A          | N/A          | 13.26        |
| S3 – Stretch 3                    | N/A          | N/A          | 14.97        |
| S4 – Stretch 1                    | 28.07        | 28.48        | 21.36        |
| S4 – Stretch 2                    | 24.69        | 16.75        | 11.09        |
| S4 – Stretch 3                    | 19.65        | 19.65        | 21.76        |
| S5 – Stretch 1                    | 27.04        | 20.64        | 16.77        |
| S5 – Stretch 2                    | 27.54        | 27.54        | 20.27        |
| S5 – Stretch 3                    | 26.29        | 26.29        | 23.72        |
| S6 – Stretch 1                    | 25.42        | 15.61        | 23.37        |
| S6 – Stretch 2                    | 28.35        | 18.68        | 13.69        |
| S6 – Stretch 3                    | 15.48        | 14.01        | 20.47        |
| S7 – Stretch 1                    | 19.58        | 19.58        | 16.04        |
| S7 – Stretch 2                    | 23.90        | 21.25        | 20.08        |
| S7 – Stretch 3                    | 25.57        | 25.10        | 20.49        |
| S8 – Stretch 1                    | 17.12        | 16.58        | 12.16        |
| S8 – Stretch 2                    | 18.58        | 18.58        | 10.67        |
| S8 – Stretch 3                    | 16.71        | 16.44        | 12.57        |
| S9 – Stretch 1                    | 4.94         | 4.94         | 5.71         |
| S9 – Stretch 2                    | 11.58        | 11.58        | 9.85         |
| S12 – Stretch 1                   | 33.78        | 33.78        | 26.46        |
| S12 – Stretch 2                   | 52.82        | 58.39        | 37.00        |
| S12 – Stretch 3                   | 44.30        | 32.87        | 32.87        |
| S13 – Stretch 1                   | 27.94        | 26.26        | 16.88        |
| S13 – Stretch 2                   | 36.16        | 36.16        | 23.26        |
| S13 – Stretch 3                   | 41.16        | 38.21        | 18.71        |
| S14 – Stretch 1                   | 22.07        | 22.07        | 16.73        |
| S14 – Stretch 2                   | N/A          | 13.01        | 16.57        |
| S14 – Stretch 3                   | 31.15        | 33.52        | 25.82        |
| S15 – Stretch 1                   | 34.88        | 35.14        | 17.40        |
| S15 – Stretch 2                   | 1.96         | 1.34         | 12.80        |
| S15 – Stretch 3                   | 13.89        | 7.91         | 24.90        |
| S16 – Stretch 1                   | 25.67        | 24.04        | 19.80        |
| S16 – Stretch 2                   | 31.32        | 31.32        | 26.47        |
| S16 – Stretch 3                   | 32.58        | 34.56        | 16.72        |
| S18 – Stretch 1                   | 25.27        | 22.07        | 25.27        |
| S18 – Stretch 2                   | 17.82        | 17.82        | 25.59        |
| S18 – Stretch 3                   | 24.12        | 24.12        | 25.13        |
| <b>Median</b>                     | <b>25.58</b> | <b>22.07</b> | <b>20.18</b> |
| <b>25<sup>th</sup> percentile</b> | <b>19.58</b> | <b>16.54</b> | <b>16.44</b> |
| <b>75<sup>th</sup> percentile</b> | <b>31.15</b> | <b>31.71</b> | <b>25.17</b> |

**Table S4: Number of  $T_{vmt}$  exceedances per gait cycle – detailed values.** Following tables present the number of  $T_{vmt}$  exceedances per gait cycle (in /gait cycle) for the different positions. N/A represents the cases where no EMG-Onset was found or where physiological inconsistencies (pre-T0 or post-catch) were found.

| Position 1 (n=37)           |            |            |        |
|-----------------------------|------------|------------|--------|
| Subject                     | Onset-Visu | Onset-Auto | MaxAcc |
| S1 – Stretch 1              | 2.75       | 2.00       | 0.00   |
| S1 – Stretch 2              | 2.75       | 2.75       | 0.00   |
| S2 – Stretch 1              | 0.00       | 0.00       | 0.80   |
| S2 – Stretch 2              | 0.00       | 0.00       | 0.20   |
| S2 – Stretch 3              | 0.20       | 0.20       | 0.20   |
| S3 – Stretch 1              | 0.00       | 0.00       | 1.00   |
| S3 – Stretch 2              | 0.00       | 0.33       | 1.00   |
| S5 – Stretch 1              | 0.00       | 0.00       | 0.00   |
| S5 – Stretch 2              | 0.00       | 0.00       | 0.00   |
| S5 – Stretch 3              | 0.00       | 0.00       | 0.00   |
| S6 – Stretch 1              | 0.00       | 0.00       | 0.00   |
| S6 – Stretch 2              | 0.00       | 0.00       | 0.00   |
| S8 – Stretch 1              | 1.00       | 1.00       | 1.00   |
| S8 – Stretch 2              | 0.00       | 0.00       | 1.00   |
| S9 – Stretch 1              | 0.00       | N/A        | 0.00   |
| S9 – Stretch 2              | 0.00       | 0.00       | 0.00   |
| S9 – Stretch 3              | 0.00       | 0.00       | 0.00   |
| S10 – Stretch 1             | 0.25       | 1.50       | 1.00   |
| S10 – Stretch 2             | 0.00       | 0.00       | 1.50   |
| S10 – Stretch 3             | 0.00       | 0.75       | 1.50   |
| S11 – Stretch 1             | 0.00       | 0.00       | 0.00   |
| S11 – Stretch 2             | N/A        | N/A        | 0.00   |
| S12 – Stretch 1             | 1.25       | 2.50       | 1.00   |
| S12 – Stretch 2             | 1.25       | 1.25       | 1.25   |
| S13 – Stretch 1             | 0.00       | 0.00       | 0.00   |
| S13 – Stretch 2             | 0.00       | 0.00       | 0.00   |
| S14 – Stretch 1             | 0.00       | 0.00       | 0.00   |
| S14 – Stretch 2             | 0.00       | 0.00       | 0.00   |
| S14 – Stretch 3             | 0.00       | 0.00       | 0.00   |
| S16 – Stretch 1             | 0.00       | 1.25       | 0.00   |
| S16 – Stretch 2             | 0.00       | 0.00       | 0.00   |
| S17 – Stretch 1             | 0.25       | 0.25       | 0.00   |
| S17 – Stretch 2             | 0.00       | 0.25       | 0.00   |
| S17 – Stretch 3             | 0.00       | 3.00       | 0.00   |
| S18 – Stretch 1             | 1.00       | 1.00       | 0.00   |
| S18 – Stretch 2             | 1.00       | N/A        | 0.00   |
| S18 – Stretch 3             | 1.00       | N/A        | 0.00   |
| Median                      | 0.00       | 0.00       | 0.00   |
| 25 <sup>th</sup> percentile | 0.00       | 0.00       | 0.00   |
| 75 <sup>th</sup> percentile | 0.25       | 1.00       | 0.80   |

|                   |
|-------------------|
| Position 2 (n=42) |
|-------------------|

| Subject                     | Onset-Visu | Onset-Auto | MaxAcc |
|-----------------------------|------------|------------|--------|
| S1 – Stretch 1              | N/A        | 1.75       | 1.75   |
| S1 – Stretch 2              | N/A        | N/A        | 1.75   |
| S2 – Stretch 1              | 0.80       | 0.00       | 0.00   |
| S2 – Stretch 2              | 0.00       | 0.00       | 0.00   |
| S2 – Stretch 3              | 0.00       | 0.00       | 0.00   |
| S3 – Stretch 1              | 0.00       | 0.00       | 0.67   |
| S3 – Stretch 2              | 0.00       | 0.00       | 0.67   |
| S4 – Stretch 1              | 0.00       | 0.00       | 1.00   |
| S4 – Stretch 2              | N/A        | 0.00       | 0.20   |
| S4 – Stretch 3              | 0.00       | 0.00       | 0.60   |
| S5 – Stretch 1              | 0.60       | 0.00       | 0.20   |
| S5 – Stretch 2              | 0.20       | N/A        | 0.20   |
| S5 – Stretch 3              | 0.20       | N/A        | 0.20   |
| S6 – Stretch 1              | 0.00       | 0.00       | 0.00   |
| S6 – Stretch 2              | 0.00       | 0.00       | 0.00   |
| S6 – Stretch 3              | 0.00       | 0.00       | 1.00   |
| S8 – Stretch 1              | 1.00       | 0.75       | 1.00   |
| S8 – Stretch 2              | 1.00       | N/A        | 1.00   |
| S8 – Stretch 3              | 1.00       | N/A        | 0.75   |
| S9 – Stretch 1              | 0.67       | 6.00       | 0.00   |
| S9 – Stretch 2              | 0.83       | 0.83       | 0.33   |
| S9 – Stretch 3              | 0.67       | 6.00       | 0.17   |
| S11 – Stretch 1             | N/A        | 0.00       | 0.00   |
| S11 – Stretch 2             | N/A        | 0.00       | 0.00   |
| S12 – Stretch 1             | 4.00       | 4.00       | 4.00   |
| S12 – Stretch 2             | 4.00       | 4.00       | 4.00   |
| S13 – Stretch 1             | 0.75       | 0.75       | 1.00   |
| S13 – Stretch 2             | 0.00       | 0.25       | 0.50   |
| S13 – Stretch 3             | 0.25       | 1.00       | 1.00   |
| S14 – Stretch 1             | 0.00       | N/A        | 0.00   |
| S14 – Stretch 2             | 1.50       | 1.50       | 0.00   |
| S15 – Stretch 1             | 0.00       | 0.00       | 0.25   |
| S15 – Stretch 2             | 1.00       | 0.00       | 0.25   |
| S15 – Stretch 3             | 0.00       | 0.00       | 0.00   |
| S16 – Stretch 1             | 2.00       | N/A        | 0.25   |
| S16 – Stretch 2             | 1.75       | 0.00       | 0.00   |
| S16 – Stretch 3             | 0.25       | 0.00       | 0.00   |
| S17 – Stretch 1             | 2.50       | 1.75       | 1.75   |
| S17 – Stretch 2             | 2.50       | 1.75       | 1.75   |
| S18 – Stretch 1             | 1.00       | N/A        | 1.00   |
| S18 – Stretch 2             | 0.75       | 1.00       | 0.00   |
| S18 – Stretch 3             | 0.75       | 0.50       | 0.00   |
| Median                      | 0.67       | 0.00       | 0.25   |
| 25 <sup>th</sup> percentile | 0.00       | 0.00       | 0.00   |
| 75 <sup>th</sup> percentile | 1.00       | 1.00       | 1.00   |

|                   |
|-------------------|
| Position 3 (n=35) |
|-------------------|

| Subject                           | Onset-Visu  | Onset-Auto  | MaxAcc      |
|-----------------------------------|-------------|-------------|-------------|
| S1 – Stretch 1                    | 0.00        | 1.00        | 1.00        |
| S1 – Stretch 2                    | 1.00        | 1.00        | 1.00        |
| S1 – Stretch 3                    | 1.00        | 1.00        | 2.00        |
| S2 – Stretch 1                    | 0.20        | 0.80        | 1.00        |
| S2 – Stretch 2                    | 0.80        | 1.00        | 1.00        |
| S2 – Stretch 3                    | 0.60        | N/A         | 1.00        |
| S5 – Stretch 1                    | 0.40        | 0.40        | 1.20        |
| S5 – Stretch 2                    | 1.00        | 1.00        | 1.20        |
| S6 – Stretch 1                    | 1.00        | 0.33        | 1.00        |
| S6 – Stretch 2                    | 1.00        | 0.33        | 1.00        |
| S8 – Stretch 1                    | N/A         | N/A         | 1.50        |
| S8 – Stretch 2                    | 1.50        | 1.50        | 1.50        |
| S8 – Stretch 3                    | 1.25        | N/A         | 2.75        |
| S9 – Stretch 1                    | 3.17        | 3.17        | 0.00        |
| S9 – Stretch 2                    | 2.67        | 2.67        | 0.00        |
| S11 – Stretch 1                   | N/A         | N/A         | 1.00        |
| S11 – Stretch 2                   | N/A         | N/A         | 1.00        |
| S12 – Stretch 1                   | 0.25        | 0.00        | 0.00        |
| S12 – Stretch 2                   | 0.25        | 0.25        | 1.50        |
| S13 – Stretch 1                   | 0.75        | 0.75        | 0.00        |
| S13 – Stretch 2                   | N/A         | N/A         | 0.00        |
| S14 – Stretch 1                   | 1.00        | 1.00        | 1.00        |
| S14 – Stretch 2                   | 1.00        | 1.00        | 1.00        |
| S14 – Stretch 3                   | 1.00        | 1.00        | 1.00        |
| S15 – Stretch 1                   | 1.00        | N/A         | 0.00        |
| S15 – Stretch 2                   | 1.00        | N/A         | 0.00        |
| S16 – Stretch 1                   | 0.00        | N/A         | 0.00        |
| S16 – Stretch 2                   | 0.00        | N/A         | 0.00        |
| S16 – Stretch 3                   | 0.00        | N/A         | 0.00        |
| S17 – Stretch 1                   | 0.50        | 0.75        | 1.00        |
| S17 – Stretch 2                   | 0.50        | 0.50        | 1.00        |
| S17 – Stretch 3                   | 0.00        | 0.00        | 1.00        |
| S18 – Stretch 1                   | 1.00        | 0.25        | 1.00        |
| S18 – Stretch 2                   | 0.50        | 0.50        | 1.00        |
| S18 – Stretch 3                   | 1.00        | 0.75        | 1.00        |
| <b>Median</b>                     | <b>1.00</b> | <b>0.78</b> | <b>1.00</b> |
| <b>25<sup>th</sup> percentile</b> | <b>0.33</b> | <b>0.38</b> | <b>0.00</b> |
| <b>75<sup>th</sup> percentile</b> | <b>1.00</b> | <b>1.00</b> | <b>1.00</b> |

**Position 4 (n=44)**

| Subject                           | Onset-Visu  | Onset-Auto  | MaxAcc      |
|-----------------------------------|-------------|-------------|-------------|
| S1 – Stretch 1                    | 0.25        | 0.25        | 0.25        |
| S1 – Stretch 2                    | 0.00        | 0.00        | 0.25        |
| S1 – Stretch 3                    | 1.00        | 1.00        | 0.25        |
| S2 – Stretch 1                    | 0.00        | N/A         | 0.00        |
| S2 – Stretch 2                    | 2.00        | 3.00        | 0.20        |
| S2 – Stretch 3                    | 0.00        | 2.00        | 0.80        |
| S3 – Stretch 1                    | 0.33        | N/A         | 1.00        |
| S3 – Stretch 2                    | N/A         | N/A         | 0.67        |
| S3 – Stretch 3                    | N/A         | N/A         | 0.67        |
| S4 – Stretch 1                    | 0.00        | 0.00        | 0.00        |
| S4 – Stretch 2                    | 0.00        | 0.00        | 0.00        |
| S4 – Stretch 3                    | 0.00        | 0.00        | 0.00        |
| S5 – Stretch 1                    | 0.00        | 0.00        | 0.00        |
| S5 – Stretch 2                    | 0.00        | 0.00        | 0.00        |
| S5 – Stretch 3                    | 0.00        | 0.00        | 0.00        |
| S6 – Stretch 1                    | 0.00        | 1.33        | 0.00        |
| S6 – Stretch 2                    | 0.00        | 0.67        | 1.33        |
| S6 – Stretch 3                    | 1.33        | 1.33        | 0.33        |
| S7 – Stretch 1                    | 0.00        | 0.00        | 0.00        |
| S7 – Stretch 2                    | 0.00        | 0.00        | 0.00        |
| S7 – Stretch 3                    | 0.00        | 0.00        | 0.00        |
| S8 – Stretch 1                    | 0.75        | 0.75        | 1.75        |
| S8 – Stretch 2                    | 0.50        | 0.50        | 2.50        |
| S8 – Stretch 3                    | 0.75        | 0.75        | 2.00        |
| S9 – Stretch 1                    | 3.00        | 3.00        | 2.00        |
| S9 – Stretch 2                    | 0.17        | 0.17        | 0.33        |
| S12 – Stretch 1                   | 0.00        | 0.00        | 0.75        |
| S12 – Stretch 2                   | 0.00        | 0.00        | 0.00        |
| S12 – Stretch 3                   | 0.00        | 0.00        | 0.00        |
| S13 – Stretch 1                   | 0.75        | 0.75        | 1.00        |
| S13 – Stretch 2                   | 0.50        | 0.50        | 1.00        |
| S13 – Stretch 3                   | 0.50        | 0.50        | 1.00        |
| S14 – Stretch 1                   | 0.00        | 0.00        | 1.00        |
| S14 – Stretch 2                   | N/A         | 1.50        | 1.00        |
| S14 – Stretch 3                   | 0.00        | 0.00        | 0.00        |
| S15 – Stretch 1                   | 0.75        | 0.75        | 1.25        |
| S15 – Stretch 2                   | 1.00        | 1.00        | 1.75        |
| S15 – Stretch 3                   | 1.50        | 1.00        | 1.00        |
| S16 – Stretch 1                   | 0.00        | 0.00        | 0.00        |
| S16 – Stretch 2                   | 0.00        | 0.00        | 0.00        |
| S16 – Stretch 3                   | 0.00        | 0.00        | 0.25        |
| S18 – Stretch 1                   | 0.25        | 1.00        | 0.25        |
| S18 – Stretch 2                   | 1.25        | 1.25        | 0.25        |
| S18 – Stretch 3                   | 0.50        | 0.50        | 0.25        |
| <b>Median</b>                     | <b>0.00</b> | <b>0.38</b> | <b>0.25</b> |
| <b>25<sup>th</sup> percentile</b> | <b>0.00</b> | <b>0.00</b> | <b>0.00</b> |
| <b>75<sup>th</sup> percentile</b> | <b>0.75</b> | <b>1.00</b> | <b>1.00</b> |

**Table S5: Proportion of the gait trial time where  $v_{mt}$  is superior to  $T_{vmt}$  – detailed values.** Following tables present the proportion of the gait trial time where  $v_{mt}$  is superior to  $T_{vmt}$  values (in %) for the different positions. N/A represents the cases where no EMG-Onset was found or where physiological inconsistencies (pre-T0 or post-catch) were found.

| Position 1 (n=37)                 |             |             |             |
|-----------------------------------|-------------|-------------|-------------|
| Subject                           | Onset-Visu  | Onset-Auto  | MaxAcc      |
| S1 – Stretch 1                    | 36.39       | 14.76       | 0.00        |
| S1 – Stretch 2                    | 39.69       | 24.17       | 0.00        |
| S2 – Stretch 1                    | 0.00        | 0.00        | 3.73        |
| S2 – Stretch 2                    | 0.00        | 0.00        | 0.66        |
| S2 – Stretch 3                    | 0.66        | 0.66        | 0.66        |
| S3 – Stretch 1                    | 0.00        | 0.00        | 5.88        |
| S3 – Stretch 2                    | 0.00        | 0.31        | 6.81        |
| S5 – Stretch 1                    | 0.00        | 0.00        | 0.00        |
| S5 – Stretch 2                    | 0.00        | 0.00        | 0.00        |
| S5 – Stretch 3                    | 0.00        | 0.00        | 0.00        |
| S6 – Stretch 1                    | 0.00        | 0.00        | 0.00        |
| S6 – Stretch 2                    | 0.00        | 0.00        | 0.00        |
| S8 – Stretch 1                    | 5.22        | 5.22        | 7.21        |
| S8 – Stretch 2                    | 0.00        | 0.00        | 5.47        |
| S9 – Stretch 1                    | 0.00        | N/A         | 0.00        |
| S9 – Stretch 2                    | 0.00        | 0.00        | 0.00        |
| S9 – Stretch 3                    | 0.00        | 0.00        | 0.00        |
| S10 – Stretch 1                   | 0.48        | 9.26        | 2.61        |
| S10 – Stretch 2                   | 0.00        | 0.00        | 8.79        |
| S10 – Stretch 3                   | 0.00        | 0.95        | 8.31        |
| S11 – Stretch 1                   | 0.00        | 0.00        | 0.00        |
| S11 – Stretch 2                   | N/A         | N/A         | 0.00        |
| S12 – Stretch 1                   | 10.51       | 15.40       | 3.67        |
| S12 – Stretch 2                   | 10.27       | 10.27       | 8.07        |
| S13 – Stretch 1                   | 0.00        | 0.00        | 0.00        |
| S13 – Stretch 2                   | 0.00        | 0.00        | 0.00        |
| S14 – Stretch 1                   | 0.00        | 0.00        | 0.00        |
| S14 – Stretch 2                   | 0.00        | 0.00        | 0.00        |
| S14 – Stretch 3                   | 0.00        | 0.00        | 0.00        |
| S16 – Stretch 1                   | 0.00        | 10.23       | 0.00        |
| S16 – Stretch 2                   | 0.00        | 0.00        | 0.00        |
| S17 – Stretch 1                   | 0.49        | 0.49        | 0.00        |
| S17 – Stretch 2                   | 0.00        | 0.74        | 0.00        |
| S17 – Stretch 3                   | 0.00        | 34.31       | 0.00        |
| S18 – Stretch 1                   | 7.69        | 2.10        | 0.00        |
| S18 – Stretch 2                   | 6.06        | N/A         | 0.00        |
| S18 – Stretch 3                   | 10.49       | N/A         | 0.00        |
| <b>Median</b>                     | <b>0.00</b> | <b>0.00</b> | <b>0.00</b> |
| <b>25<sup>th</sup> percentile</b> | <b>0.00</b> | <b>0.00</b> | <b>0.00</b> |
| <b>75<sup>th</sup> percentile</b> | <b>0.53</b> | <b>2.10</b> | <b>2.61</b> |

| Position 2 (n=42)                 |             |             |             |
|-----------------------------------|-------------|-------------|-------------|
| Subject                           | Onset-Visu  | Onset-Auto  | MaxAcc      |
| S1 – Stretch 1                    | N/A         | 5.60        | 8.65        |
| S1 – Stretch 2                    | N/A         | N/A         | 8.14        |
| S2 – Stretch 1                    | 3.07        | 0.00        | 0.00        |
| S2 – Stretch 2                    | N/A         | N/A         | 0.00        |
| S2 – Stretch 3                    | N/A         | N/A         | 0.00        |
| S3 – Stretch 1                    | 0.00        | 0.00        | 1.24        |
| S3 – Stretch 2                    | 0.00        | 0.00        | 1.55        |
| S4 – Stretch 1                    | 0.00        | 0.00        | 2.60        |
| S4 – Stretch 2                    | N/A         | 0.00        | 0.45        |
| S4 – Stretch 3                    | 0.00        | 0.00        | 1.02        |
| S5 – Stretch 1                    | 1.16        | 0.00        | 0.32        |
| S5 – Stretch 2                    | 0.21        | N/A         | 0.21        |
| S5 – Stretch 3                    | 0.42        | N/A         | 0.42        |
| S6 – Stretch 1                    | 0.00        | 0.00        | 0.00        |
| S6 – Stretch 2                    | 0.00        | 0.00        | 0.00        |
| S6 – Stretch 3                    | 0.00        | 0.00        | 2.52        |
| S8 – Stretch 1                    | 6.72        | 1.99        | 3.48        |
| S8 – Stretch 2                    | 7.71        | N/A         | 5.22        |
| S8 – Stretch 3                    | 5.47        | N/A         | 8.96        |
| S9 – Stretch 1                    | 0.73        | 28.09       | 0.00        |
| S9 – Stretch 2                    | 1.36        | 1.36        | 0.31        |
| S9 – Stretch 3                    | 0.84        | 19.81       | 0.10        |
| S11 – Stretch 1                   | N/A         | 0.00        | 0.00        |
| S11 – Stretch 2                   | N/A         | 0.00        | 0.00        |
| S12 – Stretch 1                   | 15.89       | 12.22       | 12.22       |
| S12 – Stretch 2                   | 11.00       | 11.00       | 15.16       |
| S13 – Stretch 1                   | 1.81        | 1.81        | 5.17        |
| S13 – Stretch 2                   | 0.00        | 0.26        | 1.29        |
| S13 – Stretch 3                   | 0.26        | 3.36        | 3.36        |
| S14 – Stretch 1                   | 0.00        | N/A         | 0.00        |
| S14 – Stretch 2                   | 8.42        | 8.42        | 0.00        |
| S15 – Stretch 1                   | 0.00        | 0.00        | 0.63        |
| S15 – Stretch 2                   | 7.56        | 0.00        | 0.42        |
| S15 – Stretch 3                   | 0.00        | 0.00        | 0.00        |
| S16 – Stretch 1                   | 9.53        | N/A         | 0.23        |
| S16 – Stretch 2                   | 9.07        | 0.00        | 0.00        |
| S16 – Stretch 3                   | 0.23        | 0.00        | 0.00        |
| S17 – Stretch 1                   | 14.46       | 7.11        | 10.29       |
| S17 – Stretch 2                   | 18.63       | 10.78       | 10.78       |
| S18 – Stretch 1                   | 11.66       | N/A         | 5.13        |
| S18 – Stretch 2                   | 12.12       | 5.83        | 0.00        |
| S18 – Stretch 3                   | 7.69        | 0.70        | 0.00        |
| <b>Median</b>                     | <b>1.16</b> | <b>0.00</b> | <b>0.42</b> |
| <b>25<sup>th</sup> percentile</b> | <b>0.00</b> | <b>0.00</b> | <b>0.00</b> |
| <b>75<sup>th</sup> percentile</b> | <b>8.06</b> | <b>5.66</b> | <b>3.45</b> |

| Position 3 (n=35)                 |              |              |             |
|-----------------------------------|--------------|--------------|-------------|
| Subject                           | Onset-Visu   | Onset-Auto   | MaxAcc      |
| S1 – Stretch 1                    | 0.00         | 4.83         | 4.07        |
| S1 – Stretch 2                    | 3.82         | 3.82         | 4.33        |
| S1 – Stretch 3                    | 4.07         | 5.60         | 8.91        |
| S2 – Stretch 1                    | 2.19         | 8.77         | 5.04        |
| S2 – Stretch 2                    | 8.11         | 7.68         | 2.85        |
| S2 – Stretch 3                    | 12.06        | N/A          | 3.51        |
| S5 – Stretch 1                    | 0.95         | 0.95         | 6.12        |
| S5 – Stretch 2                    | 5.49         | 5.49         | 6.55        |
| S6 – Stretch 1                    | 14.78        | 6.92         | 14.78       |
| S6 – Stretch 2                    | 14.47        | 1.26         | 5.66        |
| S8 – Stretch 1                    | N/A          | N/A          | 11.94       |
| S8 – Stretch 2                    | 11.94        | 11.94        | 14.93       |
| S8 – Stretch 3                    | 10.70        | N/A          | 16.17       |
| S9 – Stretch 1                    | 16.04        | 12.89        | 0.00        |
| S9 – Stretch 2                    | 9.64         | 8.49         | 0.00        |
| S11 – Stretch 1                   | N/A          | N/A          | 16.18       |
| S11 – Stretch 2                   | N/A          | N/A          | 16.38       |
| S12 – Stretch 1                   | 6.36         | 0.00         | 0.00        |
| S12 – Stretch 2                   | 6.36         | 6.36         | 14.67       |
| S13 – Stretch 1                   | 10.34        | 10.34        | 0.00        |
| S13 – Stretch 2                   | N/A          | N/A          | 0.00        |
| S14 – Stretch 1                   | 17.84        | 17.84        | 12.63       |
| S14 – Stretch 2                   | 19.04        | 18.44        | 9.22        |
| S14 – Stretch 3                   | 16.03        | 16.03        | 7.82        |
| S15 – Stretch 1                   | 4.83         | N/A          | 0.00        |
| S15 – Stretch 2                   | 23.95        | N/A          | 0.00        |
| S16 – Stretch 1                   | 0.00         | N/A          | 0.00        |
| S16 – Stretch 2                   | 0.00         | N/A          | 0.00        |
| S16 – Stretch 3                   | 0.00         | N/A          | 0.00        |
| S17 – Stretch 1                   | 0.98         | 10.78        | 6.13        |
| S17 – Stretch 2                   | 7.84         | 7.84         | 5.88        |
| S17 – Stretch 3                   | 0.00         | 0.00         | 4.90        |
| S18 – Stretch 1                   | 10.72        | 3.26         | 5.83        |
| S18 – Stretch 2                   | 4.20         | 4.20         | 5.83        |
| S18 – Stretch 3                   | 9.09         | 5.83         | 6.99        |
| <b>Median</b>                     | <b>7.84</b>  | <b>6.64</b>  | <b>5.83</b> |
| <b>25<sup>th</sup> percentile</b> | <b>3.00</b>  | <b>4.10</b>  | <b>0.00</b> |
| <b>75<sup>th</sup> percentile</b> | <b>12.00</b> | <b>10.45</b> | <b>9.06</b> |

| Position 4 (n=44)                 |             |             |             |
|-----------------------------------|-------------|-------------|-------------|
| Subject                           | Onset-Visu  | Onset-Auto  | MaxAcc      |
| S1 – Stretch 1                    | 0.00        | 0.00        | 0.00        |
| S1 – Stretch 2                    | 0.00        | 0.00        | 0.00        |
| S1 – Stretch 3                    | 3.31        | 3.31        | 0.00        |
| S2 – Stretch 1                    | 0.00        | N/A         | 0.00        |
| S2 – Stretch 2                    | 32.89       | 45.61       | 0.22        |
| S2 – Stretch 3                    | 0.00        | 23.68       | 5.04        |
| S3 – Stretch 1                    | 0.93        | N/A         | 7.74        |
| S3 – Stretch 2                    | N/A         | N/A         | 6.19        |
| S3 – Stretch 3                    | N/A         | N/A         | 5.88        |
| S4 – Stretch 1                    | 0.00        | 0.00        | 0.00        |
| S4 – Stretch 2                    | 0.00        | 0.00        | 0.00        |
| S4 – Stretch 3                    | 0.00        | 0.00        | 0.00        |
| S5 – Stretch 1                    | 0.00        | 0.00        | 0.00        |
| S5 – Stretch 2                    | 0.00        | 0.00        | 0.00        |
| S5 – Stretch 3                    | 0.00        | 0.00        | 0.00        |
| S6 – Stretch 1                    | 0.00        | 14.47       | 0.00        |
| S6 – Stretch 2                    | 0.00        | 5.66        | 17.92       |
| S6 – Stretch 3                    | 14.78       | 16.67       | 1.57        |
| S7 – Stretch 1                    | 0.00        | 0.00        | 0.00        |
| S7 – Stretch 2                    | 0.00        | 0.00        | 0.00        |
| S7 – Stretch 3                    | 0.00        | 0.00        | 0.00        |
| S8 – Stretch 1                    | 1.24        | 2.24        | 8.96        |
| S8 – Stretch 2                    | 1.00        | 1.00        | 18.91       |
| S8 – Stretch 3                    | 2.24        | 2.24        | 9.45        |
| S9 – Stretch 1                    | 10.48       | 10.48       | 5.45        |
| S9 – Stretch 2                    | 0.21        | 0.21        | 0.31        |
| S12 – Stretch 1                   | 0.00        | 0.00        | 0.73        |
| S12 – Stretch 2                   | 0.00        | 0.00        | 0.00        |
| S12 – Stretch 3                   | 0.00        | 0.00        | 0.00        |
| S13 – Stretch 1                   | 4.65        | 4.91        | 10.34       |
| S13 – Stretch 2                   | 1.81        | 1.81        | 7.75        |
| S13 – Stretch 3                   | 0.78        | 1.29        | 9.30        |
| S14 – Stretch 1                   | 0.00        | 0.00        | 5.81        |
| S14 – Stretch 2                   | N/A         | 13.63       | 6.21        |
| S14 – Stretch 3                   | 0.00        | 0.00        | 0.00        |
| S15 – Stretch 1                   | 1.89        | 1.68        | 12.18       |
| S15 – Stretch 2                   | 56.72       | 57.35       | 18.91       |
| S15 – Stretch 3                   | 13.24       | 31.30       | 7.14        |
| S16 – Stretch 1                   | 0.00        | 0.00        | 0.00        |
| S16 – Stretch 2                   | 0.00        | 0.00        | 0.00        |
| S16 – Stretch 3                   | 0.00        | 0.00        | 0.70        |
| S18 – Stretch 1                   | 0.23        | 2.80        | 0.23        |
| S18 – Stretch 2                   | 7.46        | 7.46        | 0.23        |
| S18 – Stretch 3                   | 0.93        | 0.93        | 0.23        |
| <b>Median</b>                     | <b>0.00</b> | <b>0.57</b> | <b>0.23</b> |
| <b>25<sup>th</sup> percentile</b> | <b>0.00</b> | <b>0.00</b> | <b>0.00</b> |
| <b>75<sup>th</sup> percentile</b> | <b>1.81</b> | <b>5.10</b> | <b>6.45</b> |
